# Supplementary material for: Bidirectional signals generated by Siglec-7 and its crucial ligand tri-sialylated T to escape of cancer cells from immune surveillance
Source: PubMed Central journal article supplement — iScience. 2024 Oct 11;27(11):111139. doi: 10.1016/j.isci.2024.111139 (PMC11539641; doi:10.1016/j.isci.2024.111139), 2024-10-11
Supplement: mmc2.pdf [file mmc2.pdf]

Table S1 Information of Sialyltransferase Expression Vector, relate to Figure 1 and Figure S2

| DDBJ Accession Number    | Gene Name    | Representative Substrates                               | Molecular species | Taxonomy | Expression vector |
|--------------------------|--------------|---------------------------------------------------------|-------------------|----------|-------------------|
| <a href="#">X73523</a>   | St3GalII     | Galb1,3GalNAc-s/t                                       | Protein           | mouse    | pcDNA3.1          |
| <a href="#">X76989</a>   | St3GalIII    | Galb1,3GalNAc-s/t                                       | Protein           | mouse    | pcDNA3.1          |
| <a href="#">X84234</a>   | ST3GalIII    | Galb1,3GlcNAc-,Galb1,4GlcNAc-                           | Protein           | mouse    | pSPORT6           |
| <a href="#">X95809</a>   | St3GalIV     | Galb1,3GlcNAc-,Galb1,4GlcNAc-                           | Protein           | mouse    | pcDNA3.1          |
| <a href="#">Y15003</a>   | St3GalV      | Lactosylceramide→GM3                                    | Lipid             | mouse    | pMIKneo           |
| <a href="#">AB063326</a> | St3galVI     | Galb1.4GlcNAc-                                          | Protein, Lipid    | mouse    | pMIKneo           |
| <a href="#">D16106</a>   | St6GalI      | Galb1.4GlcNAc-                                          | Protein           | mouse    | pcDNA3.1          |
| <a href="#">AK082566</a> | St6GalIII    | Galb1.4GlcNAc-                                          | Protein           | mouse    | pSPORT6           |
| <a href="#">Y11274</a>   | St6GalNAcI   | GalNAc-S/T, Galb1.3GalNAc-S/T, Sial2.3GalNAc-S/T        | Protein           | mouse    | pcDNA3.1          |
| <a href="#">X93999</a>   | St6GalnacII  | GalNAc-S/T, Galb1.3GalNAc-S/T, Sial2.3Galb1.3GalNAc-S/T | Protein, Lipid    | mouse    | pcDNA3.1          |
| <a href="#">Y11342</a>   | St6GalnacIII | Sial2.3Galb1.3GalNAc-, GM1b→GD1a                        | Protein, Lipid    | mouse    | pMIKneo           |
| <a href="#">Y15780</a>   | St6GalnacIV  | Sial2.3Galb1.3GalNAc-                                   | Protein           | mouse    | pcDNA3.1          |
| <a href="#">AB028840</a> | St6GalnacV   | Sial2.3Galb1.3GalNAc-, GM1b→GD1a                        | Lipid             | mouse    | pMIKneo           |
| <a href="#">AB035123</a> | St6GalnacVI  | Sial2.3Galb1.3GalNAc-, GM1b→GD1a, GT1b GD1a Lc4         | Lipid             | mouse    | pMIKneo           |
| <a href="#">X84235</a>   | St8SialI     | GM3→GD3                                                 | Lipid             | mouse    | pMIKneo           |
| <a href="#">X99646</a>   | St8SialII    | polysialyltransferase, (Sial2-8)nSia N-glycan on NCAM   | Protein           | mouse    | pcDNA3.1          |
| <a href="#">X80502</a>   | St8SialIII   | Sial2.3Galb1.4GlcNAc-                                   | Protein           | mouse    | pcDNA3.1          |
| <a href="#">X86000</a>   | St8SialIV    | polysialyltransferase, (Sial2-8)nSia                    | Protein           | mouse    | pcDNA3.1          |
| <a href="#">X98014</a>   | St8SialV     | GD1c, GT1a, GQ1b, GT3                                   | Lipid             | mouse    | pcDNA3.1          |
| <a href="#">AB059554</a> | St8SialVI    | O-glycans, Sial2,3(6)Gal-                               | Protein           | mouse    | pcDNA3.1          |

Nucleotide sequence data reported are available in DDBJ

Biosci. Biotechnol. Biochem., 72, 80025-1–13, 2008

Characterization of Mouse Sialyltransferase Genes: Their Evolution and Diversity
