# Supplementary material for: Bidirectional signals generated by Siglec-7 and its crucial ligand tri-sialylated T to escape of cancer cells from immune surveillance
Source: PubMed Central journal article supplement — iScience. 2024 Oct 11;27(11):111139. doi: 10.1016/j.isci.2024.111139 (PMC11539641; doi:10.1016/j.isci.2024.111139), 2024-10-11
Supplement: mmc3.pdf [file mmc3.pdf]

Table S2 Glycan peptides and glycan compositions derived from PLAG3 domain of 3 kinds of PDPN-Fcs, relate to Figure 6

| Sialyltransferase |       |          | Detected Sugar |        |     |       | None      | ST3Gal1,ST6GalNAc3 | ST3Gal1,ST6GalNAc3,ST8Sia6 |          |
|-------------------|-------|----------|----------------|--------|-----|-------|-----------|--------------------|----------------------------|----------|
| Glycopeptide      | RT    | Observed | Charge         | HexNAc | Hex | NeuAc | PDPN-Fc   | PDPN-Fc            | PDPN-Fc                    |          |
| Peptide sequence  | (min) | m/z      |                |        |     |       | Intensity | Intensity          | Intensity                  |          |
| <b>DDVVTPGTSE</b> |       |          |                |        |     |       |           |                    |                            |          |
|                   | 10.1  | 611.77   | 2              | 1      | 0   | 0     | ○         | ○                  | ○                          |          |
|                   | 11.7  | 757.32   | 2              | 1      | 0   | 1     | ○         | 5558               | ○ 1736198                  | ○ 368335 |
|                   | 12.5  | 778.32   | 2              | 1      | 0   | 1     |           |                    | ○ 9261                     | ★        |
|                   | 11.9  | 923.86   | 2              | 1      | 0   | 2     |           |                    | ○ 18569                    | ★        |
|                   | 11.8  | 1039.41  | 2              | 1      | 0   | 3     |           |                    | ○ 6067                     | *        |
|                   | 11.6  | 838.35   | 2              | 1      | 1   | 1     | ○         | 321136             | ○ 3392                     |          |
|                   | 11.0  | 983.89   | 2              | 1      | 1   | 2     | ○         | 152703             | ○ 7052                     | ○ 3322   |
|                   | 11.2  | 753.30   | 3              | 1      | 1   | 3     |           |                    | ○ 4700                     | ★        |
|                   | 11.3  | 713.30   | 2              | 2      | 0   | 0     |           |                    | ○ 3351                     | ★        |
|                   | 11.6  | 858.85   | 2              | 2      | 0   | 1     |           | ○ 2362             | ○ 3678                     |          |
|                   | 11.2  | 1004.40  | 2              | 2      | 0   | 2     |           | ○ 11181            |                            |          |
|                   | 11.5  | 766.97   | 3              | 2      | 0   | 3     |           |                    | ○ 5597                     | ★        |
|                   | 11.7  | 864.00   | 3              | 2      | 0   | 4     |           |                    | ○ 2475                     | ★        |
|                   | 11.1  | 794.34   | 2              | 2      | 1   | 0     | ○         | 14736              |                            |          |
|                   | 10.9  | 939.88   | 2              | 2      | 1   | 1     | ○         | 2253               |                            |          |
|                   | 11.1  | 820.99   | 3              | 2      | 1   | 3     |           | ○ 7130             |                            |          |
|                   | 11.1  | 875.36   | 2              | 2      | 2   | 0     | ○         | 216829             |                            |          |
|                   | 11.0  | 777.97   | 3              | 2      | 2   | 2     | ○         | 39170              |                            |          |
|                   | 10.5  | 895.88   | 2              | 3      | 1   | 0     | ○         | 14989              |                            |          |
|                   | 10.6  | 899.69   | 3              | 3      | 3   | 2     | ○         | 11317              |                            |          |
|                   | 10.5  | 996.72   | 3              | 3      | 3   | 3     | ○         | 6257               |                            |          |
|                   | 9.6   | 827.33   | 3              | 4      | 4   | 0     | ○         | 4622               |                            |          |
|                   | 10.3  | 1021.40  | 3              | 4      | 4   | 2     | ○         | 18158              |                            |          |

PLAG3 domain peptide (DDVVTPGTSE ) was predicted to be a Siglec-7 ligand glycan carrier. Three types of PDPN-Fc were analyzed by mass spectrometry. ST3Gal1(ST3-1), ST6GalNAc3 (ST6-3) and ST8Sia6 (ST8-6)-PDPN-Fc bound with Siglec-7 but none or ST3-1 and ST6-3-PDPN-Fc did not. Black filled stars indicate glycopeptides that are exclusively identified in ST3-1, ST6-3 and ST8-6-PDPN-Fc. RT; Retention Time. TIC; Total ion chromatograph. \*This configuration is impossible structurally, although it is possible due to mass calculations.
