# Supplementary material for: Bidirectional signals generated by Siglec-7 and its crucial ligand tri-sialylated T to escape of cancer cells from immune surveillance
Source: PubMed Central journal article supplement — iScience. 2024 Oct 11;27(11):111139. doi: 10.1016/j.isci.2024.111139 (PMC11539641; doi:10.1016/j.isci.2024.111139), 2024-10-11
Supplement: mmc5.pdf [file mmc5.pdf]

**A hPDPN extracellular sequence**

MWKVSALLFV LGSASLWVLA EGASTGQPED DTETTGLEGG VAMPGAEDDV **VTPGTSE**DRY KSLTTLVAT SVNSVTGIRI **EDLPTSE**TV **HAQ**EQSPSAT ASNVATSHST EKVDGDTQTT VE

| <b>B</b>                       |                       | <b>Intensity</b>                |                                 |
|--------------------------------|-----------------------|---------------------------------|---------------------------------|
| <b>Sequence</b>                | <b>Domain</b>         | <b>Hex(1)HexNAc(1)Neu5Ac(3)</b> | <b>Hex(1)HexNAc(1)Neu5Ac(4)</b> |
| <b>ASTGQPED</b>                | <b>PLAG1</b>          | <b>0</b>                        | <b>0</b>                        |
| <b>DTETTGLEGGVAMPGAE</b>       | <b>PLAG1, 2 and 3</b> | <b>0</b>                        | <b>0</b>                        |
| <b>DDVTPGTSE</b>               | <b>PLAG3</b>          | <b>4700</b>                     | <b>0</b>                        |
| <b>DRYKSLTTLVATSVNSVTGIRIE</b> | <b>PLAG4(PLD)</b>     | <b>0</b>                        | <b>0</b>                        |
| <b>DLPTSESTVHAQ</b>            | <b>PLAG4(PLD)</b>     | <b>21356</b>                    | <b>9413</b>                     |
| <b>EQSPSATASN VATSHSTEKV</b>   |                       | <b>6345</b>                     | <b>0</b>                        |
| <b>DTQTTTVEVLFQGP KSC</b>      |                       | <b>13941</b>                    | <b>0</b>                        |

**Table S4 Sequence of the extracellular domain of PDPN, relate to Figure 6 and Figure S7** (A) Sequences in bold are glycopeptides identified in this study using mass spectrometry. Sequences with glycosylation of tri-sialyl (red) or quadro-sialyl T (blue) structures are colored. (B) Identified sequences of PDPN-Fcs. Each underlined sequences indicate the corresponding PLAG domain (1, 2, 3 and 4). Quantitative values (Count) of sequences with glycosylation of tri-sialyl or quadro-sialyl T structure identified on PDPN-Fc from cells co-transfected with ST3-1, ST6-3, and ST8-6 are shown.
